# Supplementary material for: Analysis of atmospheric ammonia over South and East Asia based on the MOZART-4 model and its comparison with satellite and surface observations
Source: Copernicus journal article supplement (doi:10.5194/acp-2020-639), 2020-07-30
Supplement: Supplementary file 1 [file acp-2020-639-supplement.pdf]

*Supplement of*

**Analysis of atmospheric ammonia over South and East Asia  
based on the MOZART-4 model and its comparison with  
satellite and surface observations**

**Pooja Pawar et al.**

*Correspondence to:* Sachin D. Ghude (sachinghude@tropmet.res.in)

## **Supplementary material**

# **Analysis of atmospheric ammonia over South and East Asia based on the MOZART-4 model and its comparison with satellite and surface observations**

Pooja V. Pawar<sup>1\*</sup>, Sachin D. Ghude<sup>1</sup>, Chinmay Jena<sup>1</sup>, Andrea Moring<sup>2,7</sup>, Mark A. Sutton<sup>2</sup>, Santosh Kulkarni<sup>3</sup>, Deen Mani Lal<sup>1</sup>, Divya Surendran<sup>4</sup>, Martin Van Damme<sup>5</sup>, Lieven Clarisse<sup>5</sup>, Pierre-François Coheur<sup>5</sup>, Xuejun Liu<sup>6</sup>, Wen Xu<sup>6</sup>, Jize Jiang<sup>7</sup>, and Tapan Kumar Adhya<sup>8</sup>

<sup>1</sup>Indian Institute of Tropical Meteorology (IITM), Pune, 411008, India

<sup>2</sup>Centre for Ecology & Hydrology (CEH), Edinburgh, EH26 0QB, UK

<sup>3</sup>Centre for Development of Advanced Computing, Pune, 411008, India

<sup>4</sup>Indian Meteorological Department (IMD), Pune, 411005, India

<sup>5</sup>Université libre de Bruxelles (ULB), Spectroscopy, Quantum Chemistry and Atmospheric Remote Sensing (SQUARES), Brussels, B-1050, Belgium

<sup>6</sup>College of Resources and Environmental Sciences, National Academy of Agriculture Green Development, China Agricultural University, Beijing 100193, China

<sup>7</sup>The University of Edinburgh, Scotland, EH8 9AB, UK

<sup>8</sup>Kalinga Institute of Industrial Technology, Bhubaneswar, 751016, India

*Correspondence to:* Sachin D. Ghude (sachinghude@tropmet.res.in)

**Table S1. Location of NH<sub>3</sub> measurement sites from the air quality monitoring network operated by the Central Pollution Control Board, India (see also Figure 3)**

| <b>Site No.</b> | <b>Location name</b> | <b>Latitude</b> | <b>Longitude</b> | <b>Elevation (m)</b> | <b>Area</b> |
|-----------------|----------------------|-----------------|------------------|----------------------|-------------|
| 1               | Adarsh Nagar         | 26.8754         | 75.8167          | 433                  | Rural       |
| 2               | Devas                | 22.9688         | 76.0636          | 563                  | Rural       |
| 3               | Ajmer                | 26.4727         | 74.6415          | 494                  | Urban       |
| 4               | Nashik               | 20.0073         | 73.7762          | 580                  | Urban       |
| 5               | Visakhapatnam        | 17.72           | 83.3             | 26                   | Urban       |
| 6               | Ujjain               | 23.1793         | 75.7849          | 497                  | Urban       |
| 7               | Patiala              | 30.3448         | 76.3708          | 256                  | Urban       |
| 8               | Aurangabad           | 19.8406         | 75.2466          | 521                  | Urban       |
| 9               | Alwar                | 27.5591         | 76.6021          | 276                  | Urban       |
| 10              | Howrah               | 22.5707         | 88.3008          | 8                    | Coastal     |
| 11              | Kerela               | 8.5141          | 76.9477          | 23                   | Urban       |
| 12              | Vijaywada            | 16.5064         | 80.632           | 25                   | Urban       |
| 13              | Udaipur              | 24.589          | 73.7022          | 575                  | Urban       |
| 14              | Ratnapura            | 31.029          | 76.5734          | 274                  | Rural       |
| 15              | Bhiwadi              | 28.207          | 76.8577          | 268                  | Industrial  |
| 16              | Amravati             | 16.5151         | 80.5182          | 14                   | Rural       |
| 17              | Pithampur            | 22.6248         | 75.6752          | 616                  | Rural       |
| 18              | Mandideep            | 23.099          | 77.505           | 445                  | Industrial  |
| 19              | Kota                 | 25.136          | 75.8247          | 297                  | Urban       |
| 20              | Lucknow              | 26.834          | 80.8917          | 126                  | Urban       |
| 21              | Kolkata              | 22.5449         | 88.3425          | 18                   | Urban       |
| 22              | Singrauli            | 24.0886         | 82.6478          | 287                  | Rural       |
| 23              | Delhi1               | 28.8229         | 77.102           | 212                  | Urban       |
| 24              | Delhi2               | 28.6508         | 77.3152          | 224                  | Urban       |

|    |         |         |         |     |            |
|----|---------|---------|---------|-----|------------|
| 25 | Delhi3  | 28.6687 | 77.23   | 218 | Urban      |
| 26 | Delhi4  | 28.7762 | 77.0511 | 218 | Industrial |
| 27 | Delhi5  | 28.4997 | 77.2671 | 257 | Rural      |
| 28 | Delhi6  | 28.7501 | 77.1177 | 214 | Urban      |
| 29 | Delhi7  | 28.5713 | 77.0644 | 220 | Urban      |
| 30 | Delhi8  | 28.6803 | 77.2012 | 226 | Urban      |
| 31 | Delhi9  | 28.6317 | 77.2494 | 230 | Urban      |
| 32 | Delhi10 | 28.7255 | 77.1587 | 225 | Urban      |
| 33 | Delhi11 | 28.6687 | 77.1599 | 217 | Urban      |
| 34 | Delhi12 | 28.6124 | 77.2351 | 204 | Urban      |
| 35 | Delhi13 | 28.6338 | 77.198  | 219 | Urban      |
| 36 | Delhi14 | 28.6823 | 77.0349 | 217 | Urban      |
| 37 | Delhi15 | 28.6072 | 76.9459 | 218 | Urban      |
| 38 | Delhi16 | 28.6072 | 76.8408 | 212 | Urban      |
| 39 | Delhi17 | 28.6644 | 77.1704 | 238 | Urban      |
| 40 | Delhi18 | 28.5393 | 77.2687 | 233 | Urban      |
| 41 | Delhi19 | 28.6287 | 77.2946 | 220 | Urban      |
| 42 | Delhi20 | 28.6637 | 77.1196 | 22  | Urban      |
| 43 | Delhi21 | 28.632  | 77.1555 | 219 | Urban      |
| 44 | Delhi22 | 28.5646 | 77.167  | 225 | Urban      |
| 45 | Delhi23 | 28.7406 | 77.0577 | 212 | Urban      |
| 46 | Delhi24 | 28.5438 | 77.331  | 201 | Urban      |
| 47 | Delhi25 | 28.5504 | 77.2116 | 222 | Urban      |
| 48 | Delhi26 | 28.7373 | 77.2274 | 203 | Urban      |
| 49 | Delhi27 | 28.5062 | 77.2492 | 243 | Urban      |
| 50 | Delhi28 | 28.6688 | 77.3131 | 207 | Urban      |
| 51 | Delhi29 | 28.6981 | 77.1517 | 215 | Urban      |

|    |            |         |         |     |            |
|----|------------|---------|---------|-----|------------|
| 52 | Delhi30    | 28.9575 | 77.2723 | 211 | Urban      |
| 53 | Delhi31    | 28.407  | 77.8498 | 197 | Urban      |
| 54 | Delhi32    | 28.694  | 77.455  | 226 | Urban      |
| 55 | Delhi33    | 28.6679 | 77.4498 | 208 | Urban      |
| 56 | Delhi34    | 28.8253 | 78.7213 | 193 | Urban      |
| 57 | Delhi35    | 29.4677 | 77.7116 | 245 | Urban      |
| 58 | Hyderabad1 | 17.4567 | 78.3264 | 580 | Rural      |
| 59 | Hyderabad2 | 17.5111 | 78.2752 | 544 | Rural      |
| 60 | Hyderabad3 | 17.5325 | 78.1849 | 545 | Industrial |
| 61 | Hyderabad4 | 17.3507 | 78.4513 | 505 | Urban      |
| 62 | Bengaluru1 | 12.9568 | 77.5397 | 851 | Urban      |
| 63 | Bengaluru2 | 12.9135 | 77.5951 | 917 | Urban      |
| 64 | Bengaluru3 | 12.9756 | 77.6035 | 923 | Urban      |
| 65 | Bengaluru4 | 12.9172 | 77.5834 | 921 | Urban      |
| 66 | Bengaluru5 | 13.029  | 77.5197 | 909 | Urban      |
| 67 | Bengaluru6 | 12.9177 | 77.6238 | 882 | Urban      |
| 68 | Jaipur1    | 26.916  | 75.8017 | 435 | Urban      |
| 69 | Jaipur2    | 26.9503 | 75.801  | 470 | Urban      |

---

**Table S2. Location of NH<sub>3</sub> measurement sites from the Nationwide Nitrogen Deposition Monitoring Network (NNDMN) operated by China Agricultural University, China (see also Figure 3)**

| <b>Site No.</b> | <b>Location name</b>          | <b>Latitude</b> | <b>Longitude</b> | <b>Elevation (m)</b> | <b>Area</b> |
|-----------------|-------------------------------|-----------------|------------------|----------------------|-------------|
| 1               | China Agricultural University | 40.02           | 116.28           | 50                   | Urban       |
| 2               | Zhengzhou                     | 34.75           | 113.37           | 167                  | Urban       |
| 3               | Dalian                        | 38.92           | 121.58           | 18                   | Urban       |
| 4               | Nanjing                       | 31.84           | 118.85           | 9                    | Urban       |
| 5               | Baiyun                        | 23.16           | 113.27           | 16                   | Urban       |
| 6               | Wenjiang                      | 30.55           | 103.84           | 477                  | Urban       |
| 7               | Shangzhuang                   | 40.11           | 116.20           | 44                   | Rural       |
| 8               | Baoding                       | 38.85           | 115.48           | 15                   | Rural       |
| 9               | Quzhou                        | 36.78           | 114.94           | 44                   | Rural       |
| 10              | Yangqu                        | 38.05           | 112.89           | 1276                 | Rural       |
| 11              | Zhumadian                     | 33.02           | 114.05           | 69                   | Rural       |
| 12              | Yangling                      | 34.31           | 108.01           | 554                  | Rural       |
| 13              | Yucheng                       | 36.94           | 116.63           | 24                   | Rural       |
| 14              | Gongzhuling                   | 43.53           | 124.83           | 201                  | Rural       |
| 15              | Lishu                         | 43.36           | 124.17           | 129                  | Rural       |
| 16              | Wuwei                         | 38.07           | 102.60           | 1493                 | Rural       |
| 17              | Wuxue                         | 30.01           | 115.79           | 16                   | Rural       |
| 18              | Taojiang                      | 28.61           | 111.97           | 130                  | Rural       |
| 19              | Fengyang                      | 32.88           | 117.56           | 66                   | Rural       |
| 20              | Zhanjiang                     | 21.26           | 110.33           | 24                   | Rural       |
| 21              | Fuzhou                        | 26.17           | 119.36           | 432                  | Rural       |

|    |              |       |        |      |           |
|----|--------------|-------|--------|------|-----------|
| 22 | Fenghua      | 29.61 | 121.53 | 34   | Rural     |
| 23 | Ziyang       | 30.13 | 104.63 | 360  | Rural     |
| 24 | Yanting      | 31.28 | 105.47 | 506  | Rural     |
| 25 | Jiangjin     | 29.06 | 106.18 | 292  | Rural     |
| 26 | Lingshadao   | 35.77 | 120.18 | 0    | Coastal   |
| 27 | Changdao     | 37.93 | 120.75 | 59   | Coastal   |
| 28 | Duolun       | 42.20 | 116.49 | 1239 | Grassland |
| 29 | Bayingbuluke | 42.88 | 83.71  | 2468 | Grassland |
| 30 | Feiyue       | 28.56 | 113.34 | 77   | Forest    |
| 31 | Huinong      | 28.52 | 113.41 | 96   | Forest    |
| 32 | Xishan       | 28.61 | 113.31 | 230  | Forest    |

---

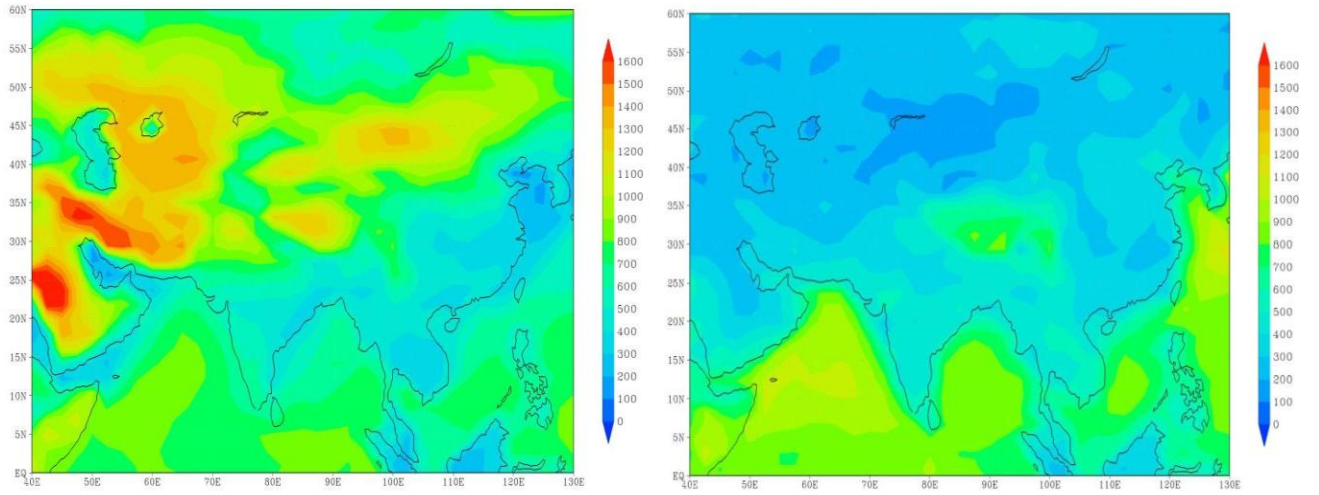

**Figure S1. MOZART-4 model estimate of Planetary boundary layer height (PBLH) (m) during summer (JJA) season (left) and during winter (DJF) season (right).**



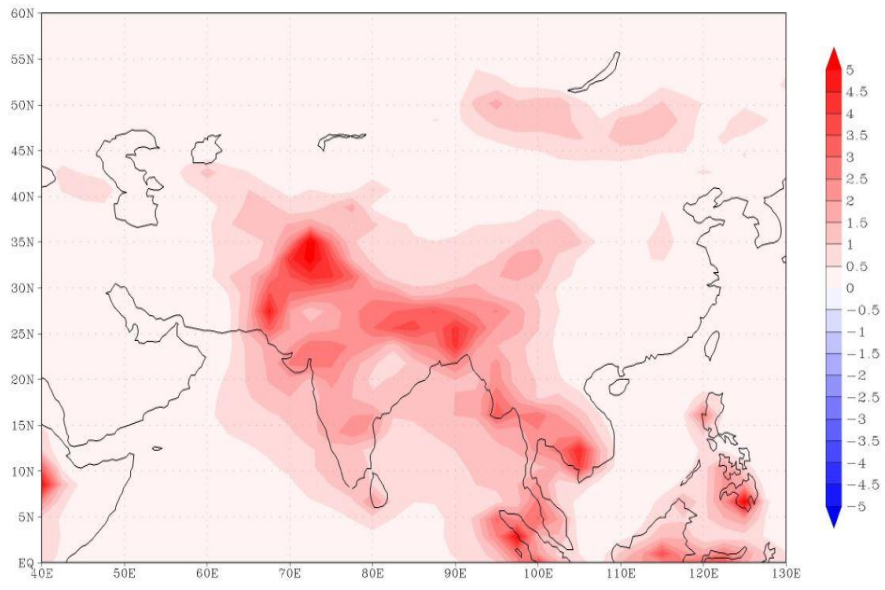

**Figure S2. MOZART-4 model estimate of annual averaged  $\text{NH}_3/\text{NH}_4$  ratio ( $\times 10^9$  ppb) over Asia.**

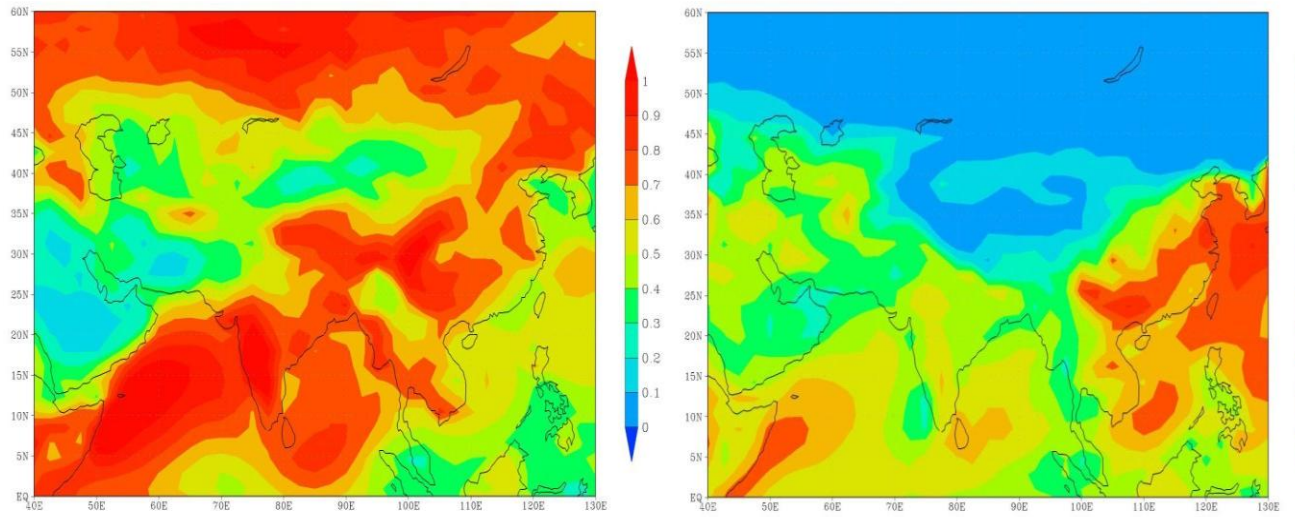

**Figure S3. MOZART-4 model estimate of dry deposition velocity (cm/s) during summer (JJA) season (left) and during winter (DJF) season (right).**

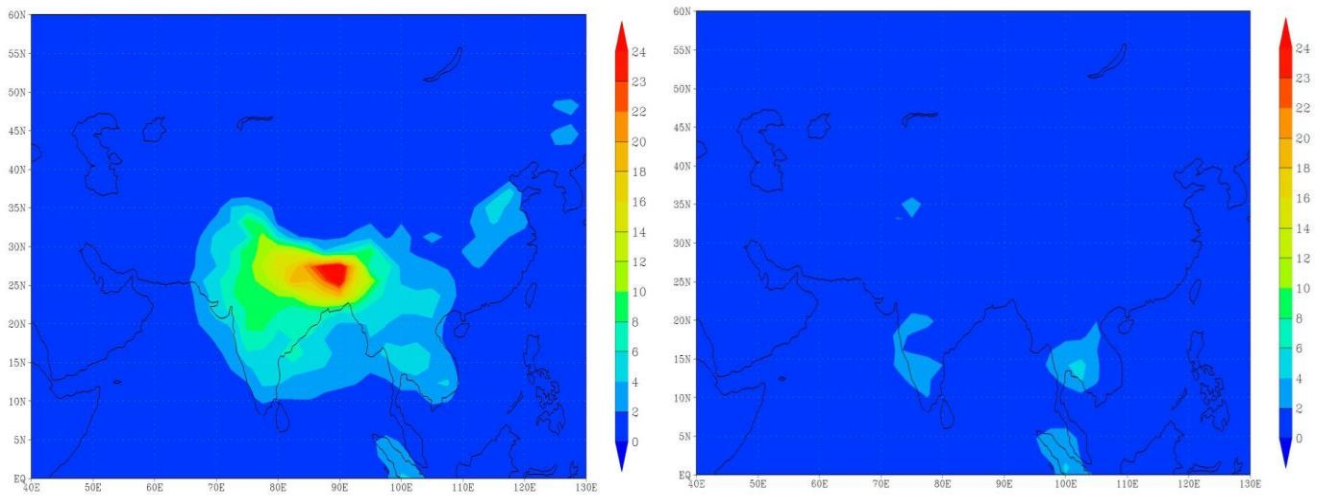

**Figure S4. MOZART-4 model estimate of  $\text{NH}_3$  wet deposition flux ( $\times 10^{-9} \text{ kg m}^{-2} \text{ s}^{-1}$ ) during summer (JJA) season (left) and during winter (DJF) season (right).**

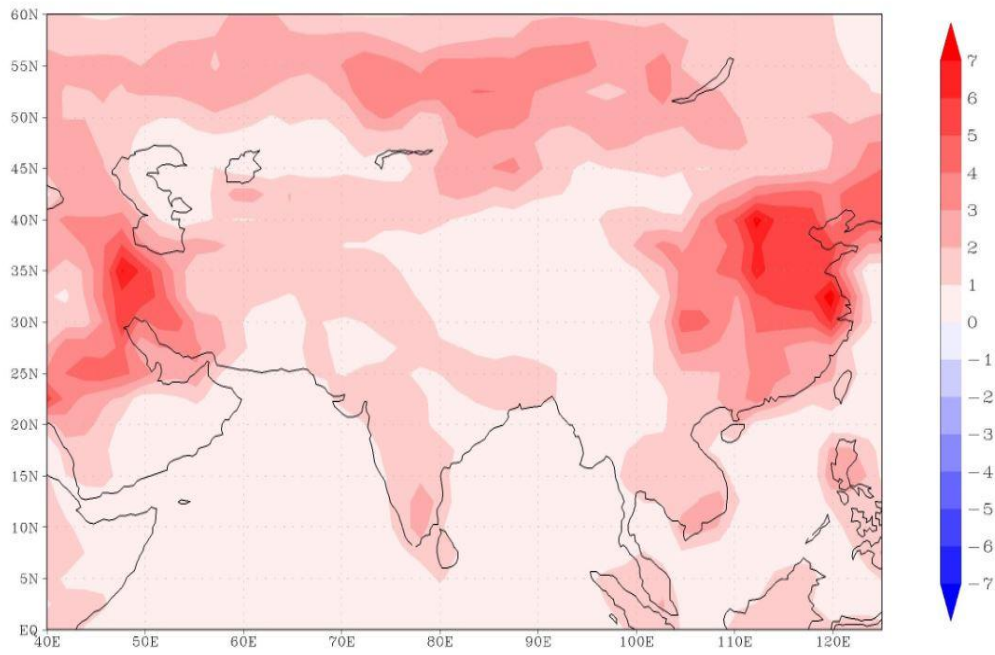

**Figure S5. MOZART-4 model estimate of annual averaged  $\text{NH}_3$  total emissions/ $\text{NH}_3$  total column ratio ( $\times 10^{-5} \text{ S}^{-1}$ ) over Asia.**
